**Title:** Decoding the contents of working memory tracks strategy and performance in prospective remembering

**Abbreviated title:** Decoding working memory in prospective memory

**Authors:** Jarrod A. Lewis-Peacock<sup>1</sup>, Jonathan D. Cohen<sup>2</sup>, and Kenneth A. Norman<sup>2</sup>

<sup>1</sup>Department of Psychology and Imaging Research Center  
University of Texas, Austin, TX 78712, USA

<sup>2</sup>Department of Psychology and Princeton Neuroscience Institute  
Princeton University, Princeton, NJ 08540, USA

**Corresponding author:** Jarrod A. Lewis-Peacock, [jalewpea@utexas.edu](mailto:jalewpea@utexas.edu),  
108 E. Dean Keeton St., Austin, TX, 78712

**Number of pages:** 29

**Number of figures:** 3

**Number of tables, multimedia and 3D models:** 0

**Abstract:** 167 of 250

**Introduction:** 649 of 650

**Discussion:** 1065 of 1500

**Conflict of Interest:** None

**Acknowledgements:** We thank Matthew Salesi and Vivian DeWoskin for assistance with behavioral piloting of this experiment. We also thank Jeremy Manning, Jordan Poppenk, Nicholas Turk-Browne, Ida Momennejad, Richard Lewis, and Satinder Singh for many helpful discussions during the development and analysis of this experiment. This research was funded by NIMH grant R01 MH069456 awarded to K.A.N. and by through the support of a grant from the John Templeton Foundation. The opinions expressed in this paper are those of the authors and do not necessarily reflect the views of the John Templeton Foundation.

## Abstract

Theories of prospective memory (PM) posit that it can be subserved either by working memory (WM) or episodic memory (EM). Testing and refining these multiprocess theories of PM requires a way of tracking participants' reliance on WM versus EM. Here we use multi-voxel pattern analysis (MVPA) to derive a trial-by-trial measure of WM use in prospective memory. We manipulated strategy demands by varying the degree of proactive interference (which hurts EM) and the memory load required to perform the secondary task (which hurts WM). Our MVPA measures showed 1) greater WM use and 2) a trial-by-trial correlation between WM use and PM behavior for the condition in which participants were pushed to rely more on WM. Finally, we also showed that MVPA measures of WM use are not redundant with other behavioral measures: in the condition in which participants were pushed more to rely on WM, using neural and behavioral measures together led to better prediction of PM accuracy than either type of measure on its own.

*Keywords:* prospective memory, working memory, episodic memory, fMRI, MVPA

## Significance Statement

To accomplish our goals, we must remember them, and this can be challenging when our cognitive resources are in demand. Multiple strategies can support prospective remembering – people can use working memory to actively maintain the goal, or they can store the goal in episodic memory and retrieve it later when needed. Here we measured participants' use of working memory on a trial-by-trial basis using functional MRI. Our neural measure of working memory varied according to task conditions that were designed to manipulate strategy use, and it led to better prediction of trial-by-trial prospective memory accuracy than could be achieved based purely on behavioral measures. These data provide the strongest connection to date between neural data and prospective memory behavior.

## INTRODUCTION

Prospective memory (PM) refers to our ability to remember to do things in the future. Theories of PM (Cohen and O'Reilly, 1996; McDaniel and Einstein, 2000) posit that two strategies can be used: Participants can use working memory (WM) to actively monitor the environment for an appropriate time or event (Koechlin and Hyafil, 2007; Gilbert, 2011) or they can store the intention in episodic memory (EM) and hope that it is automatically retrieved when the time comes to act on that intention (McDaniel and Einstein, 2007b; Beck et al., 2014; for related ideas about dual systems involved in PM and control see Cohen and O'Reilly, 1996 and Braver, 2012). PM is typically studied using a dual-task paradigm in which a PM task is embedded in another cognitive task that requires vigilance and frequent behavioral decisions (the “ongoing task”). The PM task requires a response after a particular event (the PM “target”) or after a certain amount of time has elapsed.

This *multiprocess* view of PM (Cohen and O'Reilly, 1996; McDaniel and Einstein, 2000) raises important questions about when people will rely on one memory strategy vs. the other, and how this strategy choice will affect performance. The current framing of the theory posits an adaptive view of the memory system in which there is a bias to minimize the cognitive demands of the PM task, thereby reducing interference costs from strategic monitoring (Smith, 2003; Einstein et al., 2005; Hicks et al., 2005). Thus an automatic retrieval strategy (relying on EM) is favored whenever possible so as not to overly burden ongoing processing. However, the theory also specifies some circumstances when sustained, strategic monitoring (relying on WM) should be used, for example in “non-focal” tasks in which identification of a PM target requires attention to features that are not relevant to ongoing processing demands (Einstein et al., 2005; Scullin et al., 2010).

To date, the primary approach to tracking use of strategic monitoring has been to measure RT costs on the ongoing task, with the logic being that greater monitoring for the PM target will lead to slower RTs on the ongoing task (Smith, 2003; Einstein et al., 2005; Smith, 2010;

Einstein and McDaniel, 2010; Scullin et al., 2010). Neural data has also been used to improve identification of strategy use. fMRI studies of PM have linked strategic monitoring in PM tasks to sustained activity in frontoparietal control networks including anterior regions of the prefrontal cortex (e.g., Reynolds, 2009; McDaniel et al., 2013). In another study, Gilbert (2011) used multi-voxel pattern analysis (MVPA; Lewis-Peacock and Norman, 2014b) of fMRI to successfully decode the contents of WM. However, with all of the above studies, the neural measures of WM engagement that were used were not sensitive enough to predict PM accuracy on a trial-by-trial basis.

One goal of our study was to use a more sensitive, time-varying measure of WM engagement (MVPA decoding of PM target processing) in an effort to improve trial-by-trial predictions of PM behavior beyond what is possible by observing behavior alone. The other goal was to gain a richer understanding of the factors that shape PM strategy use. We designed a non-focal PM experiment that manipulated proactive interference and WM load, using stimuli in an ongoing task (letter strings) that were completely non-overlapping with stimuli in a PM task (faces and scenes). One condition was designed to bias participants to use strategic monitoring ( $WM_{bias}$ ; high proactive interference + low memory load), and another was designed to bias participants to rely on automatic retrieval ( $EM_{bias}$ ; low proactive interference + high memory load). Using this paradigm, we found that strategic monitoring (measured using MVPA) was both higher overall and more tightly linked to behavior in the  $WM_{bias}$  condition than the  $EM_{bias}$  condition; we also found that our MVPA measure of strategic monitoring improved our ability to predict PM performance from trial to trial, beyond what is possible based on behavior alone.

## **MATERIALS AND METHODS**

### ***Participants***

Twenty-five participants (14 female; ages 18 to 34, mean = 23.2; all right-handed) were recruited for this study using online scheduling software provided by the Department of

Psychology at Princeton University. Participants were compensated with \$20 per hour for their participation in the two-hour experiment. Written informed consent was obtained in a manner approved by the Princeton Institutional Review Board.

*[ insert Fig. 1 here ]*

### **Behavioral Paradigm**

We developed a task to examine how participants strategically use episodic memory (EM) versus working memory (WM) to remember goals in a dual-task prospective memory (PM) experiment. Participants were shown a series of words while pictures of faces and scenes were presented in the background (Fig. 1a). Participants performed an ongoing task (OG; making lexical decisions about strings of letters) while monitoring for a picture target (a particular face or a particular scene) to reappear. Whereas many studies (see McDaniel and Einstein, 2007a) have used letter stimuli for both the OG task and the PM task, we used pictures (faces and scenes) in the PM task and letters in the OG task (making this a “non-focal” PM task; Einstein et al., 2005; McDaniel et al., 2013). We did this because thoughts about faces and scenes are easily trackable with fMRI (Lewis-Peacock & Norman, 2014b); as such, using faces and scenes maximizes our ability to use fMRI to track the maintenance of PM targets in WM. Each “target trial” (in which participants performed both the OG task and the PM task) began with the introduction of a picture target for 2 sec, followed by a 2-sec blank screen, followed by a variable-length sequence of 2-sec memory probes, each containing two pictures and a string of letters. In a random one-third of trials, the target introduction screen at the beginning of the trial was blank, indicating to participants that they could ignore all subsequent pictures for the remainder of that trial and focus solely on the OG task (we call these “no-target” trials). Participants were required to make repeated lexical judgments about the letter strings until the picture target reappeared (between 2 sec and 42 sec after its introduction). In the OG task, a

lexical judgment for a given probe required an n-back comparison ( $n = 1$  or  $2$ ) of lexical status: i.e., does the current probe have the same lexical status (word or non-word) as the 1-back or 2-back probe? For example, in the 1-back condition, the letter string “apple” (a word) on one probe followed by the letter string “boat” (also a word) on the next probe word require a *same* response for the OG task. If, instead of “boat” appearing on the second probe, the letter string “glorb” (a nonword) appeared, the appropriate response on the OG task would be *different*. The proportion of same/different responses required was balanced across the experiment. Participants made lexical judgments by pushing a button with the index finger (*same* response) or middle finger (*different* response) of their right hands on a four-button response box. Participants had a 1.9 sec deadline within which to register their responses. For the PM task, participants could identify the picture target when it reappeared by pushing a third button with their pinky finger. Participants were instructed to ignore the OG task on such probes, but they were not prevented from responding to both tasks on any probe (e.g., they could make an OG task response first and then make a PM response, or vice versa, before the response deadline). The PM target reappeared once per trial, and its reappearance marked the end of the trial.

Visual feedback was provided after every response. In the OG task, white letter strings immediately turned green if the participant responded correctly, and they turned red if the participant responded incorrectly. In the PM task, if a participant false-alarmed to a distractor picture during a probe (i.e., they incorrectly endorsed a distractor picture as the target picture) the border of the screen turned red for the duration of that probe, but then the trial continued without disruption. When a participant correctly identified a picture target (which only appeared on the final probe of each trial), the border of the screen turned green for the duration of that probe. After this, a screen appeared that indicated whether the participant correctly identified the PM target (black screen with green text stating “*You got it!*”), or failed to identify the target (yellow screen with red text stating “*Oops, you missed it...*”). This screen was omitted and the screen remained black on no-target trials. There was a brief 6-sec rest period between each trial

to allow for the hemodynamic signal to return to baseline. At the end of each block of trials, participants were shown their average response accuracy for both the OG task and the PM task on that block.

The logic of our experiment was motivated by the multiprocess framework of PM (Cohen and O'Reilly 1996; McDaniel and Einstein, 2000) and the dual mechanisms of control framework (Braver, 2012), which suggest that there are multiple processes than can support prospective remembering: strategic/attention-demanding processes, and also relatively automatic processes. In our PM task, we reasoned that a participant would be able to identify the picture target by either maintaining an active representation (in WM) of the target and strategically monitoring for its reappearance throughout the trial, or spontaneously retrieve (from EM) the identity of the target at the moment that it reappeared. To manipulate participants' strategy use, we varied the WM load associated with the OG task and the degree of proactive interference associated with the PM targets across trials. Specifically, there are two trial conditions that we refer to as "EM<sub>bias</sub>" (high working memory load + low proactive interference) and "WM<sub>bias</sub>" (low working memory load + high proactive interference). EM<sub>bias</sub> trials were designed to bias participants to use retrieval from EM for prospective remembering. We reasoned that, when a trial involved a higher WM load for the OG task (2-back lexical judgments), participants would be less likely to maintain the picture target in WM, relying instead on retrieval from EM. On these trials, we also used a large set of trial-unique, heterogenous pictures to reduce the amount of proactive interference amongst the target and distractor pictures. WM<sub>bias</sub> trials were designed to bias participants to use WM to maintain the picture target and to actively monitor for its reappearance. We reasoned that high proactive interference (resulting from the repetition of a small, homogenous set of pictures that repeated within and across trials; Wickens et al., 1963) would interfere with EM retrieval, and that a lower WM load on the ongoing task (Meier and Zimmermann, 2015; 1-back lexical judgments) would encourage a WM strategy for prospective remembering in these trials.

The experiment was divided into six 15-trial blocks of trials, alternating between blocks of  $WM_{bias}$  and  $EM_{bias}$  trials. The trial condition used for the first block was randomly assigned to each participant and counter-balanced across participants. Each block consisted of 12 “real trials” (with exactly one trial of each length, ranging from 10 to 21 probes per trial, inclusive) and three “catch trials” (ranging in length between one and nine probes per trial, with the selection of trial lengths balanced across blocks). Only data from real trials were used for analysis; the catch trials were used to balance cognitive demands throughout the entire trial, i.e., to prevent participants from ignoring the pictures in the first nine probes before engaging in the PM task. There were five trials in each block for each target category (face-target, scene-target, and no-target trials), consisting of four real trials and one catch trial per category per block. Ignoring catch trials, there was a total of eight target trials and four no-target trials in each block. The trials were configured such that there were an equal number of probes in each block (62 probes from real trials, and 15 probes from catch trials). Each target category was presented in all of the 12 real-trial lengths and in three of the possible catch-trial lengths in both  $WM_{bias}$  and  $EM_{bias}$  conditions, resulting in a total of 90 trials (72 real trials, 18 catch trials) across the entire experiment. The trials were arranged in this way to reduce participants’ ability to predict the length of any given trial; no participant reported an ability to predict trial length, or knowledge of any structure or pattern of trial lengths across the experiment.

### ***Stimulus Details***

A large collection of face and scene images was gathered through various online and in-house sources. A subset of these stimuli were chosen for this experiment. Words for the lexical comparison task consisted of nouns, verbs, and adjectives selected from an online psycholinguistic database ([http://websites.psychology.uwa.edu.au/school/MRCDatabase/uwa\\_mrc.htm](http://websites.psychology.uwa.edu.au/school/MRCDatabase/uwa_mrc.htm)) with concreteness, imageability, and verbal frequency within one standard deviation of the mean of

the entire database. Pseudo-words consisted of single-syllable, pronounceable letter strings. To manipulate proactive interference amongst picture targets, we varied the type and quantity of pictures used in each trial condition.

In the WM<sub>bias</sub> condition, we used a small set of eight homogenous face images (adult white males) and eight homogenous scene images (indoor living rooms) that repeated within and across trials. In the EM<sub>bias</sub> condition, we used a large set of heterogenous faces (789 total; 321 female) and scenes (223 total; 82 indoor) that were trial-unique. The assignment of stimuli to the targets and distractors in each trial was done randomly for each participant.

### ***fMRI Data Collection***

The experiment was presented using Psychophysics Toolbox Version 3 in Matlab running on a Mac Pro. First, we ran a brief scout localizer scan (15 s) to verify that head position was within the designated field of view and to derive automatic AC-PC alignment parameters for subsequent scans. Next, we used a MPRAGE sequence to acquire high-resolution T1-weighted images (TR = 2300 ms, TE = 3.08 ms, 0.9 mm<sup>3</sup> isotropic voxels, 9 m 0 s acquisition time) while the participants practiced one block of trials in both WM<sub>bias</sub> and EM<sub>bias</sub> conditions prior to functional scanning. The experiment was divided into six 15-trial blocks of trials (with each block lasting 10 min 3 sec). Total functional scanning time for the experiment was 60 m 18 s. All blocks were preceded by 20 s of dummy pulses to achieve a steady state of tissue magnetization. Between blocks, participants were given a break during which the experimenter checked that the participant was comfortable and alert. Whole-brain images were acquired with a 3T Siemens Skyra MRI scanner. For functional scans, we used a gradient-echo, echo-planar sequence (TR = 2000 ms, TE = 34 ms), with automatic shimming enabled, to acquire T2\*-weighted data sensitive to the BOLD signal within a 64 × 64 matrix (196mm FoV, 34 axial slices, 3 mm<sup>3</sup> isotropic voxels, AC-PC aligned) using integrated parallel acquisition techniques (iPAT) with both retrospective and prospective acquisition motion correction (PACE) enabled.

## ***fMRI Preprocessing***

Preprocessing of the functional data was done with the AFNI (Cox, 1996) software package using the following preprocessing steps (in order): (1) correction for slice time acquisition with 3dTshift, (2) rotation of oblique data to cardinal direction with 3dWarp, (3) resample to a 3 mm<sup>3</sup> gridset with 3dresample, and (4) realign to the first volume of the Phase 1 data using rigid body alignment with 3dvolreg. Anatomical data were aligned to the first volume of the functional data with align\_epi\_anat.py. A whole-brain voxel mask was created for each participant by combining the results of 3dAutomask (dilation = 1) across all six functional runs.

## ***Multi-Voxel Pattern Analysis: Overview***

Our goal in analyzing the fMRI data was to sensitively measure processing associated with the PM task. To accomplish this goal, we used multi-voxel pattern analysis (MVPA; Haynes and Rees, 2006; Norman et al., 2006; Lewis-Peacock and Norman, 2014b) to decode face and scene processing (associated with PM task) and lexical decision processing (associated with the OG task) at every time point throughout the trials. The use of category classifiers to track memory maintenance and retrieval has become a standard approach in the memory literature (see Rissman and Wagner, 2012, for a review). We use the approach here to decode the contents of WM, by identifying the degree to which the category of the PM target (a face or a scene) is actively represented prior to its actual reappearance. Neural evidence of such activity could arise from a combination of maintenance of the target (e.g. a particular face) in WM and the processing of distractor pictures from the target's category (non-target faces) during the trials. Importantly, either source of target-related neural evidence would indicate the use of a WM-dependent strategic monitoring strategy – reactive control relying on EM retrieval should not produce target-related activity prior to the reappearance of the PM target.

### ***Multi-Voxel Pattern Analysis: Details***

fMRI pattern classifiers were trained, separately for each participant, from a subset of all trials and then used to decode independent data from held-out trials (i.e., using k-fold cross validation: training on  $k-1$  blocks of data and testing on the  $k^{\text{th}}$  block and then rotating and repeating until all blocks had been tested.) Both  $EM_{\text{bias}}$  and  $WM_{\text{bias}}$  trials were combined for classifier training. Specifically, classifiers were trained on individual brain scans (acquired at 2-sec intervals) from the probe period of each trial, plus data from the 6-sec rest intervals between trials, in the training set. Training scans were labeled according to the category of the picture target from that trial: either *face*, *scene*, or *no-target*. Scans from the inter-trial intervals were labeled as *rest*. Note that visual input was identical in all three trial conditions (participants were viewing letter strings in the middle of the screen flanked above/below by faces and scenes). The purpose of including the no-target condition in classifier training was to provide additional “negative examples” for the face and scene target classifiers (i.e., trials where faces and scenes were onscreen but participants were not actively monitoring for face or scene targets). As is standard practice in MVPA (Lewis-Peacock and Norman, 2014b) all trial regressors were shifted forward in time by 6 sec to account for hemodynamic lag of the BOLD signal (typically estimated as 4-8 sec to peak after event onset). In each training block, there were 58 scans each for face, scene, and no-target categories, and 45 scans for the rest category, for a total of 290 scans for task categories and 225 scans for the rest category in each training set. We used the trained classifier in each fold of the cross-validation procedure to decode the moment-to-moment cognitive state throughout the held-out block of test data. For each individual 2-sec scan within a test block, the four classifiers (face, scene, no-target, and rest) each produced an estimate (from 0 to 1) of the degree of neural evidence for the condition they were trained to detect.

All pattern classification analyses were performed using the Princeton MVPA Toolbox in Matlab (downloadable from <http://www.pni.princeton.edu/mvpa>), using L2-penalized logistic regression. The L2 regularization term biases the algorithm to find a solution that minimizes the

sum of the squared feature weights. Logistic regression uses a parameter ( $\lambda$ ) that determines the impact of the regularization term. To set the penalty  $\lambda$ , we explored how changing the penalty affected our ability to classify the data (using the cross-validation procedure described above). We found that the function relating  $\lambda$  to cross-validation accuracy was relatively flat across a wide range of  $\lambda$  values (spanning from 0.001 to 1,000). We selected a  $\lambda$  value in the middle of this range ( $\lambda = 50$ ) and used it for all of our classifier analyses.

### **Voxel Selection**

To select brain regions to feed into the pattern classifiers, we ran a mass-univariate GLM analysis of all functional data using AFNI's *3dDeconvolve* to identify brain regions that were more strongly engaged during probes (i.e., stimulus displays after the target introduction but prior to its reappearance) on target trials vs. no-target trials. This analysis reveals voxels sensitive to the presence of the PM task on top of the OG task. All trial events were modeled with boxcar regressors of appropriate lengths: target (2 sec), probes (2 sec per probe), PM probes (the final probe of the trial in which the target reappears; 2 sec) and feedback (2 sec). A third-order polynomial was used for the null hypothesis, and all basis functions for trial events were normalized to have an amplitude of one. A contrast of *probes from target trials > probes from no-target trials* was used to calculate percent-signal-change in BOLD data for a second-level group analysis. Participant results in native space were transformed into atlas space and resampled to  $4\text{mm}^3$  isotropic voxels using AFNI's *@auto\_tlrc* and then spatially blurred with a 8mm FWHM kernel using *3dmerge*. The normalized group data were analyzed using *3dttest++*, and the results were extracted using a cluster radius of four voxels with a minimum cluster size of 40 voxels, and thresholded at the individual voxel level using AFNI's false discovery rate (FDR) algorithm with  $q = .05$ . Finally, this group-level ROI was backward-transformed into each participant's native space and intersected with that participant's whole-brain mask to create subject-specific ROIs. The mean number of voxels retained in this "PM-sensitive" mask was

11,686 (SD = 1,122) (Fig. 2a). Finally, a feature selection ANOVA was applied to the preprocessed fMRI data within the PM-sensitive mask to select those voxels whose activity varied significantly ( $p < .05$ ) between the four categories over the course of the experiment. Feature selection was performed separately for each iteration of the cross-validation classifier training algorithm to avoid any circularity in the analysis (Kriegeskorte et al., 2009). The pattern of activity across these feature-selected voxels was used as the input to the pattern classifiers and the data were analyzed in each participant's native space.

### ***Relating Classifier Evidence to Prospective Remembering***

The primary goal of our analysis was to evaluate the relationship between neural classifier evidence for PM monitoring during the trial (prior to target reappearance) to PM accuracy at the end of each trial. We first extracted (separately for each trial in every subject) the levels of face and scene classifier evidence at each time point throughout the trials, and use these data rather than classifier accuracy (whether the correct category had the highest likelihood estimate) for all subsequent analyses (see Lewis-Peacock et al., 2012; Lewis-Peacock and Norman, 2014a). Classifier evidence provides a more sensitive measure of neural processing (and in particular dual-task processing) compared to classifier accuracy because it does not require forced-choice selection of a single “best match” category. To aggregate data across trials that were of varying lengths, we aligned data to the beginning of each trial. Note that the minimum trial length used for analysis contained 10 2-sec probes. Accounting for the target introduction (2 sec) and the brief delay prior to the probes (2 sec), the earliest that the target reappeared in any trial was  $2 + 2 + 10 \times 2 = 24$  sec. Each trial's data therefore consisted of 11 brain scans (22-sec, unshifted for haemodynamic lag) aligned to the start of the trial and ending prior to the reappearance of the target.

On a target trial, target classifier output alone does not show how sensitive the classifier is to the attentional demands of the PM task. High target activation (e.g., “face” on a face-target

trial) could reflect a highly differentiated attentional state in which target is high and distractor (“scene”) is low, or it could reflect a totally undifferentiated state in which both target and distractor are high. Therefore, to track neural processing specifically related to the PM task, we calculated a difference score by subtracting the distractor category evidence from the target category evidence at each time point. Finally, we averaged these difference scores during the PM delay period ( $t = 12$  to  $22$  secs), which started after the evoked neural response to the target introduction had subsided, and ended before the target reappeared on any of the trials. This method provides a unique neural estimate of PM processing for each trial.

### ***Statistical Procedures for Assessing Reliability***

When analyzing behavioral data (without respect to neural data) and neural data (without respect to behavioral data) we used standard random-effects statistics (paired t-tests, with subjects as a random effect) to assess the reliability of our results across participants. For our analyses relating neural data to behavior (i.e., PM performance), we combined individual trial data from each participant into a single “supersubject” and subsequently performed all statistical analyses on these amalgamated data (Detre et al., 2013; Kim et al., 2014; Lewis-Peacock and Norman, 2014a), using bootstrap procedures (Efron, 1979) to assess population-level reliability of the results (see details below). We used this approach, chosen *a priori*, instead of the conventional random-effects approach (used elsewhere in the paper) in which the *average* results from each subject are used for group-level hypothesis testing. The reason for using the supersubject approach here is that, despite a large amount of imaging data per subject, the total number of behavioral outcomes for each subject was relatively low, making it difficult to reliably estimate the relationship between neural data and behavioral outcomes within individual subjects. Note that each trial lasted between 24 and 46 sec, depending on the number of probes on that trial, but there was only one PM behavioral outcome (hit or miss) on each trial regardless of its length.

In this experiment, each participant (N=25) contributed 12 trials per category/condition combination (e.g., face-target and WM<sub>bias</sub> condition) for a total of 300 trials per combination. To assess population-level reliability of the results (i.e., whether or not they driven by a small subset of participants) from each of our analyses, we also ran a bootstrap test in which we resampled data from participants with replacement and re-computed the analyses for this resampled data (Efron, 1979). The population-level reliability of the results was reflected in the proportion of bootstrap samples in which the effect of interest was present.

## RESULTS

### **Behavioral Results**

#### *Prospective Memory Task*

We assessed the impact of *trial condition* (WM<sub>bias</sub> vs. EM<sub>bias</sub>) and *target type* (face vs. scene) on both accuracy and RT in the prospective memory task (PM task). With regard to PM accuracy: the hit rate was reliably higher for scene-target trials ( $p < .01$  in both trial conditions), but we nonetheless combined data from both face-target and scene-target trials to increase our statistical power for subsequent analyses. PM accuracy was marginally higher for WM<sub>bias</sub> trials compared to EM<sub>bias</sub> trials (71.3% vs. 66.0%,  $t(24)=1.96$ ,  $p=.061$ ). There was no interaction between trial condition and target type ( $F(1,24)=.017$ ,  $p=.898$ ). The false-alarm rate to non-target items was very close to floor across all trials, although the rate was slightly higher in WM<sub>bias</sub> trials than EM<sub>bias</sub> trials (0.6% vs. 0.2%;  $t(24)=3.98$ ,  $p<.001$ ). Because of this very low false alarm rate, we also calculated PM accuracy using the A' signal detection metric, which considers both hits and false alarms (Stanislaw and Todorov, 1999). Consistent with the raw hit rates, the A' signal detection analysis showed a non-significant trend for higher accuracy in WM<sub>bias</sub> trials (0.926) compared to EM<sub>bias</sub> trials (.914),  $t(24)=1.71$ ,  $p=.100$ . With regard to PM target detection RTs: mean target detection RTs did not differ significantly between EM<sub>bias</sub> trials (1.16 sec) and WM<sub>bias</sub> trials (1.19 sec),  $t(24) = 1.33$ ,  $p=.197$ . No speed-accuracy tradeoff (i.e., a

positive correlation between accuracy and RT) was observed in either condition ( $WM_{bias}$ :  $r(23) = -.52$ ,  $p=.008$ ;  $EM_{bias}$ :  $r(23) = -.08$ ,  $p=.714$ ).

### *Ongoing Task*

We assessed the impact of *trial condition* ( $WM_{bias}$  vs.  $EM_{bias}$ ) and *target type* (target vs. no-target) on both RT and accuracy in the ongoing lexical-judgment task (OG task). There was no main effect of trial condition on OG task RTs ( $F(1,24)=2.27$ ,  $p=.15$ ), but participants did respond more slowly on target trials compared to no-target trials ( $F(1,24)=63.7$ ,  $p<.001$ ). As noted in the *Introduction*, this slowing of responses in the OG task — a dual-task interference cost that we will refer to as “PM cost” — has been interpreted as a behavioral marker for the use of a WM strategy (i.e., that working memory resources were deployed for strategic monitoring of the PM target; McDaniel and Einstein, 2000). We predicted that PM costs would be higher on  $WM_{bias}$  trials, and this prediction was upheld. There were PM costs in both trial conditions, but PM costs were significantly larger in  $WM_{bias}$  trials ( $F(1,24)=18$ ,  $p<.001$ ; Fig. 1b). This same result holds when restricting analyses to the PM delay period ( $t = 12$  to  $22$  secs) that was used to extract neural measurements of PM task processing and OG task processing on each trial ( $F(1,24) = 16.8$ ,  $p<.001$ ). With regard to OG task accuracy: participants responded more accurately in  $WM_{bias}$  trials compared to  $EM_{bias}$  trials (.804 vs. .686;  $F(1,24)=56.1$ ,  $p<.001$ ), and also more accurately on no-target trials compared to target trials (.772 vs. .717;  $F(1,24)=28.94$ ,  $p<.001$ ), but there was no significant interaction of trial condition and target type ( $F(1,24)=0.47$ ,  $p=.5$ ). These differences in accuracy are consistent with the assumption that the OG task was more demanding in  $WM_{bias}$  trials compared to  $EM_{bias}$  trials (1-back vs. 2-back); similarly, the greater number of errors in the dual-task (target) condition than the single-task (no-target condition) is consistent with the greater demands of the former.

### *Individual Differences in PM Performance*

PM accuracy and PM cost (i.e., dual-task interference RT costs: OG RT on target trials minus OG RT on non-target trials) both reflect the outcome of strategy choices, and specifically, working memory allocations spread across the dual PM task and OG task. These two metrics were positively correlated across subjects ( $r(24) = .37$ ,  $p = .034$ ; Fig. 1b), indicating that higher PM costs were associated with better PM performance. This relationship was previously reported by Smith (2003; but see McNerney and West, 2007). The correlation was significant for  $WM_{bias}$  trials ( $r(24) = .45$ ,  $p = .024$ ), but not for  $EM_{bias}$  trials ( $r(24) = .199$ ,  $p = .340$ ). However, the correlation did not significantly differ between the two conditions ( $z = -.755$ ,  $p = .45$ ).

[ insert Fig. 2 here ]

## **fMRI Results**

### *Classifier Cross-Validation*

A univariate GLM was used to identify voxels that were more active on target trials vs. no-target trials (see Methods). These voxels were located mostly in ventral temporal, occipital, and parietal areas (Fig. 2a), and were used as input for pattern classification. Pattern classifiers, trained and tested separately for each participant, successfully distinguished task-related brain activity on (1) face-target trials, (2) scene-target trials, and (3) no-target trials, and also task-unrelated brain activity during (4) rest periods between trials. Cross-validated classifier accuracy was greater than chance-level performance (0.25) for all four categories (all  $p$ 's < .001), and all three task-related categories showed higher accuracy in  $WM_{bias}$  trials vs.  $EM_{bias}$  trials (all  $p$ 's < .001), while accuracy for rest-period activity did not differ between conditions ( $t(24)=0.189$ ,  $p=0.852$ ). Classification performance did not differ between face-target and scene-target trials ( $p>.4$ ), therefore classifier estimates from all target trials were relabeled and combined (e.g., on a face-target trial, the “face-target” classifier’s output was relabeled as “target” and the “scene-target” classifier’s output was relabeled as “distractor”).

The PM classifier evidence scores (i.e., “target - distractor”) showed a significant interaction of *trial condition* ( $WM_{bias}$  vs.  $EM_{bias}$ ) x *time* (target introduction: 4-12 secs vs. delay period: 12-22 secs;  $F(1,24) = 32.37$ ,  $p < .001$ ). PM evidence did not differ between  $WM_{bias}$  and  $EM_{bias}$  trials during the early part of the trials (8 secs following target introduction,  $t = 4$  to 12 secs,  $p = .598$ ), but it did differ during the subsequent delay period ( $F(1,24) = 31.26$ ,  $p < .001$ ; Fig. 2b) with higher PM evidence on  $WM_{bias}$  trials during the delay. This result is consistent with the prediction that participants would engage in more active monitoring on  $WM_{bias}$  trials. The fact that classifier performance was matched for  $WM_{bias}$  and  $EM_{bias}$  trials during the early part of the trial suggests that differences in classification can not be attributed to generally poorer classification on  $EM_{bias}$  trials (vs.  $WM_{bias}$  trials); rather, the difference in classifier performance appears to be specific to the delay period.

### ***Relating Classifier Evidence to PM Performance***

For each trial, we calculated a PM classifier evidence score (as described above) and used this score to predict PM performance (hit or miss) at the end of each trial. Logistic regression was used to relate each continuous classifier evidence score to the binary outcome variable of PM accuracy. To increase statistical power for this regression, individual trial data were combined across subjects into a supersubject analysis (see *Methods*), and reliability of the regression analysis was assessed using a bootstrapping procedure.

Consistent with the prediction that participants would rely more heavily on WM in the  $WM_{bias}$  condition, PM classifier evidence scores were positively correlated with PM accuracy in  $WM_{bias}$  trials (logistic regression  $\beta_1 > 0$  in 99.6% of 1,000 bootstraps), but they were not reliably correlated with PM accuracy in  $EM_{bias}$  trials. Regression coefficients were higher for  $WM_{bias}$  trials compared to  $EM_{bias}$  trials in 94.4% of bootstraps (Fig. 2d), indicating that trial-by-trial fluctuations in PM classifier evidence were more predictive of behavior on  $WM_{bias}$  trials compared to  $EM_{bias}$  trials.

### ***Relating OG Task Behavior to PM Performance***

The OG task behavioral metrics (accuracy and RT) were also predictive of PM accuracy across trials. OG task accuracy was positively correlated with PM accuracy in both trial conditions ( $\beta_1 = .284$ , which was positive on 99.3% of bootstraps in both trial conditions), with no reliable difference between the coefficients in the two conditions. OG task RT was weakly, but positively correlated with PM accuracy in both trial conditions ( $\beta_1 = .212$  for  $WM_{bias}$  and  $\beta_1 = .160$  for  $EM_{bias}$ ). These coefficients were positive on 93.2% and 89.1% of bootstraps, respectively, with no reliable difference between the coefficients in the two conditions.

### ***Combining Behavioral Data and Neural Data to Predict PM Performance***

The findings above indicate that both behavioral and neural measures were predictive of PM performance from trial to trial. Here we address the question of whether neural evidence provided extra predictive power beyond what was possible from behavioral observations alone. Using our neural measure (PM evidence) and the two behavioral measures (OG accuracy and OG RT) together in a three-predictor logistic regression model explained the most variance in PM accuracy scores. To control for differences across models in the number of predictors, we used a leave-one-participant out cross-validation procedure (Hastie et al., 2005): each model was fit using data from N-1 participants and then used to predict data from the held out participant. Average log likelihood values across all iterations for each model were used to calculate Bayes factors ( $B_{10}$ ), which assess the relative likelihood of each model (Kass and Raftery, 1995). The three-predictor model outperformed the two-predictor model (OG accuracy and OG RT) in  $WM_{bias}$  trials ( $\log_{10}(B_{10}) = 3.12$ ; this constitutes “decisive” evidence according to Kass and Raftery, 1995), but not in  $EM_{bias}$  trials ( $\log_{10}(B_{10}) = 0.38$ ; this is “not worth more than a bare mention” according to Kass and Raftery, 1995). Importantly, this analysis demonstrates that the neural measurements of PM task processing contributed predictive power concerning

PM performance on a given trial, above and beyond what could be predicted based on observable OG task behavior alone.

*[ insert Fig. 3 here ]*

### ***Individual Differences in Relating Neural Measurements to Performance***

The neural findings also revealed individual differences in performance across participants. The amount of PM classifier evidence for a given participant was positively correlated with both overall PM accuracy ( $r(25)=.73$ ,  $p<.001$ ) and overall dual-task PM costs ( $r(25)=.43$ ,  $p<.05$ ; Fig. 3).

## **DISCUSSION**

We developed a novel experimental paradigm, designed to bias strategy choice for prospective memory (PM) on a trial to trial basis, by concurrently manipulating proactive interference and working memory load. When participants were biased to use working memory (WM) instead of episodic memory (EM), the PM task exerted a larger cost on the ongoing task (as evidenced by slower RTs) — this dual-task interference cost is considered to be a behavioral hallmark of strategic monitoring (Smith, 2003; Einstein et al., 2005; Scullin et al., 2010; Meier and Zimmermann, 2015). Previously, behavioral interference costs have been used to demonstrate effects of a wide range of factors on PM strategy use, including: the availability of cognitive resources and the sensitivity to interference costs (Marsh et al., 2003; Smith, 2003; Marsh et al., 2006), the instructional emphasis on the PM task and the duration of the ongoing task (Einstein et al., 2005), the degree & type of planning (Mäntylä, 1996; Burgess and Shallice, 1997), and individual differences in cognitive capacities and personality characteristics (McDaniel and Einstein, 2000). In this study we identified another set of task demands that bias participants

towards a WM strategy: *high proactive interference* (which makes it harder to use EM) combined with a *low working memory load* (which makes it easier to use WM).

In addition to behavioral evidence, we used pattern classifiers applied to fMRI data from visual processing regions in temporal and occipital cortices during the PM task to acquire second-by-second readouts of neural activity associated with the use of WM to maintain and/or monitor for a PM picture target. Neural readouts of PM processing were higher when participants were biased to use WM (vs. EM). Furthermore, across trials, PM classifier evidence was more predictive of successful PM performance when participants were biased to use WM compared to when participants were biased to use EM, even though PM accuracy was equivalent across the two conditions. These findings complement and extend prior work that has leveraged fMRI data to dissociate PM strategies using activity from a distributed network of brain regions. For example, work by McDaniel et al. (McDaniel et al., 2013) showed that activity in frontoparietal control networks was greater in conditions that require greater levels of strategic monitoring (e.g., non-focal vs. focal PM targets; for other relevant data, see Reynolds et al., 2009; Burgess et al., 2011; McDaniel et al., 2013; Barban et al., 2014; Beck et al., 2014).

Crucially, our neural measure of WM use provided additional predictive power concerning PM performance, beyond that provided by behavior alone. This demonstrates how decoding the contents of WM from fMRI data can provide unique evidence concerning the selection and success of cognitive strategies deployed during complex cognitive tasks. Prior work has shown that the content of delayed intentions (e.g., waiting for a word versus a picture to reappear) can be decoded from posterior cortical regions (Gilbert, 2011). However, these neural measurements were unrelated to behavioral metrics of PM performance. Here, we found that (particularly when participants were biased to use WM to store their delayed intention) neural readouts of WM use were diagnostic of PM target detection accuracy on a trial-by-trial basis. Across participants, these neural measures were also diagnostic of individual differences both in PM accuracy and dual-task interference costs.

It is important to note that both the EM<sub>bias</sub> and WM<sub>bias</sub> conditions in our experiment were “non-focal” tests of PM, insofar as the stimuli pertaining to the ongoing task (letter strings) were distinct from the stimuli that pertained to the PM task (faces and scenes). As such, both conditions required some degree of strategic monitoring: Specifically, participants had to allocate some attention to the stream of faces and scenes, in order to be able to detect the face or scene target when it appeared. Our key prediction was that, in the EM<sub>bias</sub> condition, participants might favor monitoring for the target *category* without actively maintaining the *specific identity* of the target stimulus. For example, if the participant knew that the target was a face, they might actively monitor the stream of faces, with the expectation that the target face would trigger episodic retrieval of its status as a target. By contrast, in the WM<sub>bias</sub> condition, participants might devote extra WM resources to monitoring for the specific target face. The fact that *some* strategic monitoring was required in both conditions fits with the finding that dual-task costs (on OG task reaction times) were obtained in both conditions, although (as predicted) they were larger in the WM<sub>bias</sub> condition.

One potential limitation of the MVPA measure we used to index WM engagement is that it is sensitive to *both* of the types of monitoring described above: checking the “stream” of face stimuli (without holding a specific face in mind), and monitoring for a specific face. There is no way to disentangle the contribution of these two processes to our neural measures. Nevertheless, both sources reflect the engagement of some form of strategic monitoring. The finding that our MVPA measure of WM function was stronger in WM<sub>bias</sub> trials is consistent with the engagement of *both* monitoring processes on those trials (checking the target category “stream”, plus monitoring for specific target stimuli), whereas only the checking process may have been engaged in EM<sub>bias</sub> trials. This might also explain why our neural measure of WM was more predictive of behavior in WM<sub>bias</sub> trials: monitoring for the specific target stimulus should substantially increase the likelihood of responding correctly when the target appears, thus WM use should be correlated with correct responding. By contrast, merely checking the target

category stream (without actively holding the correct stimulus in mind) is insufficient to insure a correct response – even when the target stimulus is seen, it might fail to trigger the corresponding episodic memory, resulting in a PM error; thus, there should be a weaker relationship between WM use and correct responding.

In conclusion, we designed an experiment to bias participants to use either WM or EM to solve a PM task while simultaneously engaged in a demanding retrospective memory task. Using MVPA (Lewis-Peacock and Norman, 2014b) to measure strategic monitoring, we validated that our manipulation was effective in biasing participants' strategies. More generally, using MVPA improved our sensitivity to participants' strategy use beyond what was possible based on behavior alone, leading to improved trial-by-trial predictions of PM accuracy. Future work can leverage these improvements to further characterize the factors that shape PM performance.

## REFERENCES

- Barban F, Carlesimo GA, Macaluso E, Caltagirone C, Costa A (2014) Functional interplay between stimulus-oriented and stimulus-independent attending during a prospective memory task. *Neuropsychologia* 53:203-212.
- Beck SM, Ruge H, Walser M, Goschke T (2014) The functional neuroanatomy of spontaneous retrieval and strategic monitoring of delayed intentions. *Neuropsychologia* 52:37-50.
- Braver TS (2012) The variable nature of cognitive control: a dual mechanisms framework. *Trends Cogn Sci* 16:106-113.
- Burgess PW, Gonen-Yaacovi G, Volle E (2011) Functional neuroimaging studies of prospective memory: what have we learnt so far? *Neuropsychologia* 49:2246-2257.
- Burgess PW, Shallice T (1997) The relationship between prospective and retrospective memory: Neuropsychological evidence. *Cognitive models of memory* 5:249-256.
- Cohen JD, O'Reilly RC (1996). A Preliminary Theory of the Interactions Between Prefrontal Cortex and Hippocampus that Contribute to Planning and Prospective Memory. In *Prospective Memory: Theory and Applications* (Brandimonte M, Einstein MO, McDaniel MA, eds), pp267-296. Lawrence Erlbaum Associates.
- Cox RW (1996) Software for analysis and visualization of functional magnetic resonance neuroimages. *Computers and Biomedical Research* 29:162-173.
- Detre GJ, Natarajan A, Gershman SJ, Norman KA (2013) Moderate levels of activation lead to forgetting in the think/no-think paradigm. *Neuropsychologia* 51:2371-2388.
- Efron B (1979) Bootstrap Methods: Another Look at the Jackknife. *The Annals of Statistics* 7:1-26.
- Einstein GO, McDaniel MA (2010) Prospective memory and what costs do not reveal about retrieval processes: A commentary on Smith, Hunt, McVay, and McConnell (2007). *J Exp Psychol Learn Mem Cogn* 36:1082-8; discussion 1089-95.
- Einstein GO, McDaniel MA, Thomas R, Mayfield S, Shank H, Morrisette N, Breneiser J (2005) Multiple processes in prospective memory retrieval: factors determining monitoring versus spontaneous retrieval. *J Exp Psychol Gen* 134:327-342.
- Gilbert SJ (2011) Decoding the content of delayed intentions. *Journal of Neuroscience* 31:2888.
- Hastie T, Tibshirani R, Friedman J, Franklin J (2005) The elements of statistical learning: data mining, inference and prediction. *The Mathematical Intelligencer* 27:83-85
- Haynes J-D, Rees G (2006) Decoding mental states from brain activity in humans. *Nat Rev Neurosci* 7:523-534.
- Hicks JL, Marsh RL, Cook GI (2005) Task interference in time-based, event-based, and dual intention prospective memory conditions. *Journal of Memory and Language* 53:430-444.
- Kass RE, Raftery AE (1995) Bayes factors. *Journal of the American Statistical Association* 90:773-795

Kim G, Lewis-Peacock JA, Norman KA, Turk-Browne NB (2014) Pruning of memories by context-based prediction error. *Proc Natl Acad Sci U S A* 111:8997-9002.

Koechlin E, Hyafil A (2007) Anterior prefrontal function and the limits of human decision-making. *Science* 318:594-598.

Kriegeskorte N, Simmons WK, Bellgowan PSF, Baker CI (2009) Circular analysis in systems neuroscience: the dangers of double dipping. *Nat Neurosci* 12:535-540.

Lewis-Peacock JA, Drysdale AT, Oberauer K, Postle BR (2012) Neural evidence for a distinction between short-term memory and the focus of attention. *J Cogn Neurosci* 24:61-79.

Lewis-Peacock JA, Norman KA (2014a) Competition between items in working memory leads to forgetting. *Nat Commun* 5:5768.

Lewis-Peacock JA, Norman KA (2014b) Multivoxel Pattern Analysis of Functional MRI Data. In: *The Cognitive Neurosciences* (Gazzaniga MS, Mangun GR, eds), pp911-920. MIT Press.

Marsh RL, Hicks JL, Cook GI (2006) Task interference from prospective memories covaries with contextual associations of fulfilling them. *Mem Cognit* 34:1037-1045.

Marsh RL, Hicks JL, Cook GI, Hansen JS, Pallos AL (2003) Interference to ongoing activities covaries with the characteristics of an event-based intention. *J Exp Psychol Learn Mem Cogn* 29:861-870.

Mäntylä T (1996) Activating actions and interrupting intentions: Mechanisms of retrieval sensitization in prospective memory. In: *Prospective memory: Theory and applications* (Brandimonte MA, Einstein GO, McDaniel MA, eds), pp93-113.

McDaniel MA, Einstein GO (2000) Strategic and automatic processes in prospective memory retrieval: A multiprocess framework. *Applied cognitive psychology* 14:S127-S144.

McDaniel MA, Einstein GO (2007a) *Prospective memory: An overview and synthesis of an emerging field*. Sage Publications, Inc.

McDaniel MA, Einstein GO (2007b) Spontaneous retrieval in prospective memory. In: *The foundations of remembering: Essays in honor of Henry L. Roediger III*, pp227-242.

McDaniel MA, Lamontagne P, Beck SM, Scullin MK, Braver TS (2013) Dissociable neural routes to successful prospective memory. *Psychol Sci* 24:1791-1800.

McNerney MW, West R (2007) An imperfect relationship between prospective memory and the prospective interference effect. *Mem Cognit* 35:275-282.

Meier B, Zimmermann TD (2015) Loads and loads and loads: the influence of prospective load, retrospective load, and ongoing task load in prospective memory. *Front Hum Neurosci* 9:322.

Norman KA, Polyn SM, Detre GJ, Haxby JV (2006) Beyond mind-reading: multi-voxel pattern analysis of fMRI data. *Trends Cogn Sci* 10:424-430.

Reynolds JR, West R, Braver T (2009) Distinct neural circuits support transient and sustained processes in prospective memory and working memory. *Cereb Cortex* 19:1208-1221.

Rissman J, Wagner AD (2012) Distributed representations in memory: insights from functional brain imaging. *Annu Rev Psychol* 63:101-128.

Scullin MK, McDaniel MA, Shelton JT, Lee JH (2010) Focal/nonfocal cue effects in prospective memory: monitoring difficulty or different retrieval processes? *J Exp Psychol Learn Mem Cogn* 36:736-749.

Smith RE (2003) The cost of remembering to remember in event-based prospective memory: Investigating the capacity demands of delayed intention performance. *J Exp Psychol Learn Mem Cogn* 29:347-361.

Smith RE (2010) What Costs Do Reveal and Moving Beyond the Cost Debate: Reply to Einstein and McDaniel (in press). *J Exp Psychol Learn Mem Cogn* 36:1089-1095.

Stanislaw H, Todorov N (1999) Calculation of signal detection theory measures. *Behav Res Methods Instrum Comput* 31:137-149.

Wickens DD, Born DG, Allen CK (1963) Proactive inhibition and item similarity in short-term memory. *Journal of Verbal Learning and Verbal Behavior* 2:440-445.

## FIGURE LEGENDS

**Figure 1.** Task diagram and behavioral performance. (A) The dual-task PM experiment consisted of a picture-target detection task embedded in an ongoing lexical-decision task (WM<sub>bias</sub> trials: 1-back lexical decisions and small set of homogenous pictures; EM<sub>bias</sub> trials: 2-back lexical decisions and large set of trial-unique heterogenous pictures). (B) Group behavioral performance on the PM task, including target hit rates (left column), dual-task costs to reaction time on the ongoing task (middle column), and the relationship between these two performance metrics across participants. Error bars indicate s.e.m., \* $p < .05$ .

**Figure 2.** Pattern classification of fMRI data during the delay period predicts PM performance. (A) Voxels that showed significantly greater activity ( $p < .05$ , FDR) during probes on target trials compared to no-target trials are colored on an inflated atlas brain. This group-level mask was transformed into each participant's native space and used to mask voxel time series data as input for the pattern classifiers. (B) Trial-averaged classifier evidence for PM trials. PM classifier evidence indicates the difference between target category and distractor category evidence (e.g., "face minus scene" for face-target trials). Error shades indicate  $\pm 1$  s.e.m., interpolated between mean scores from every 2-sec brain scan. Data are not shifted to account for haemodynamic lag. (C) Relating trial-by-trial classifier evidence scores during the delay period (12 to 22 sec) to PM accuracy (hit vs. miss). Data reflect the logistic regression fits ( $\beta_1$ ) between PM classifier evidence and PM accuracy. Error bars indicate 95% bootstrap confidence intervals, \* $p < .05$  for 1,000 bootstrap samples.

**Figure 3.** Classifier evidence scores predict PM accuracy and dual-task PM costs across participants. Higher PM classifier evidence was predictive of (A) better PM accuracy and (B) higher dual-task costs. \* $p < .05$ .

**Figure 1**

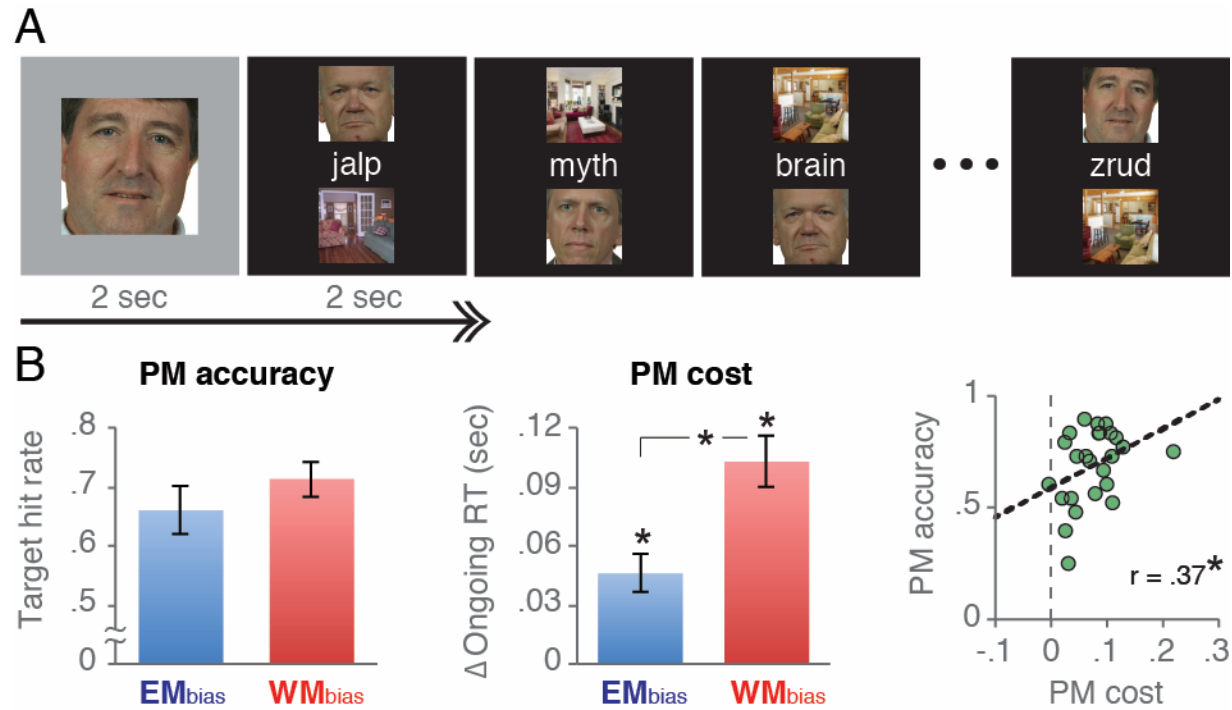

**Figure 2**

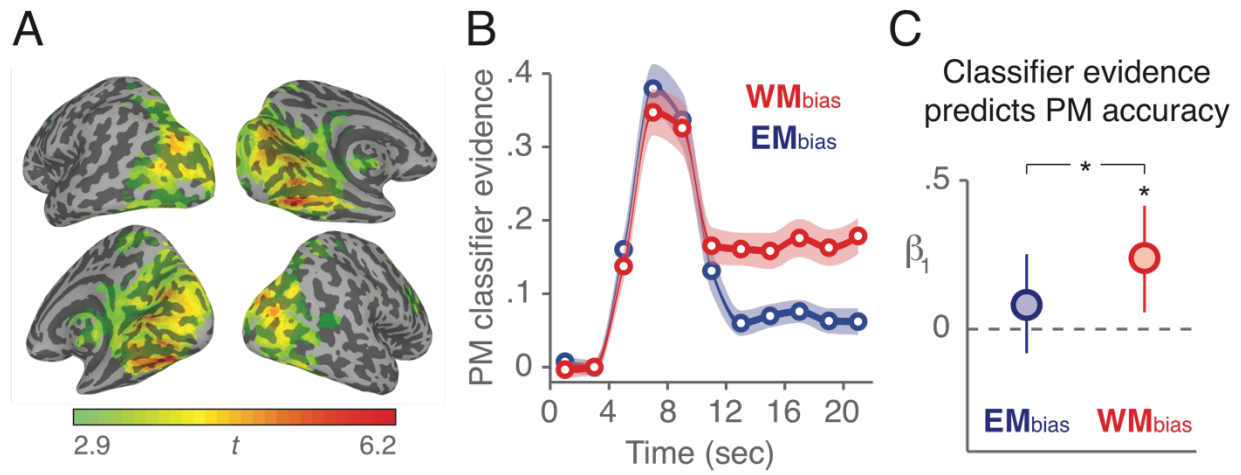

**Figure 3**

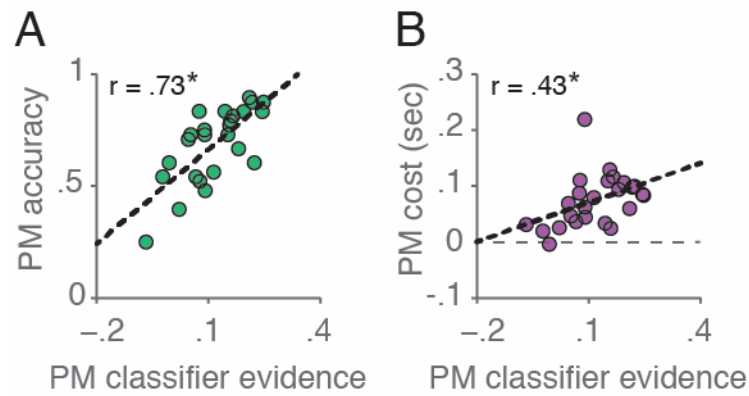

Source: http://biorxiv.org/content/10.1101/055004v1.full.pdf
